# Supplementary material
Source: Springer Nature journal article supplement (https://www.springermedizin.de/resource/supplementary/13054_2009_8421_MOESM1_ESM.pdf/9731924)

**(a)**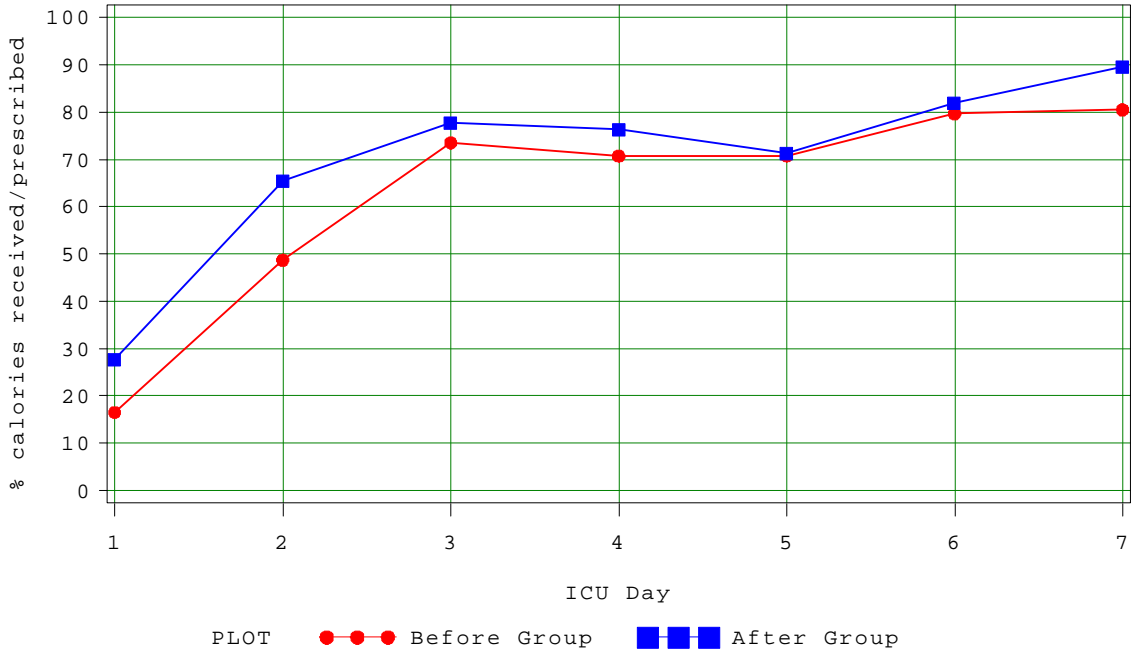

|                | Day 1 | Day 2 | Day 3 | Day 4 | Day 5 | Day 6 | Day 7 | Total |
|----------------|-------|-------|-------|-------|-------|-------|-------|-------|
| <b>P-value</b> | 0.75  | 0.13  | 0.72  | 0.49  | 0.80  | 0.63  | 0.35  | 0.31  |

**(b)**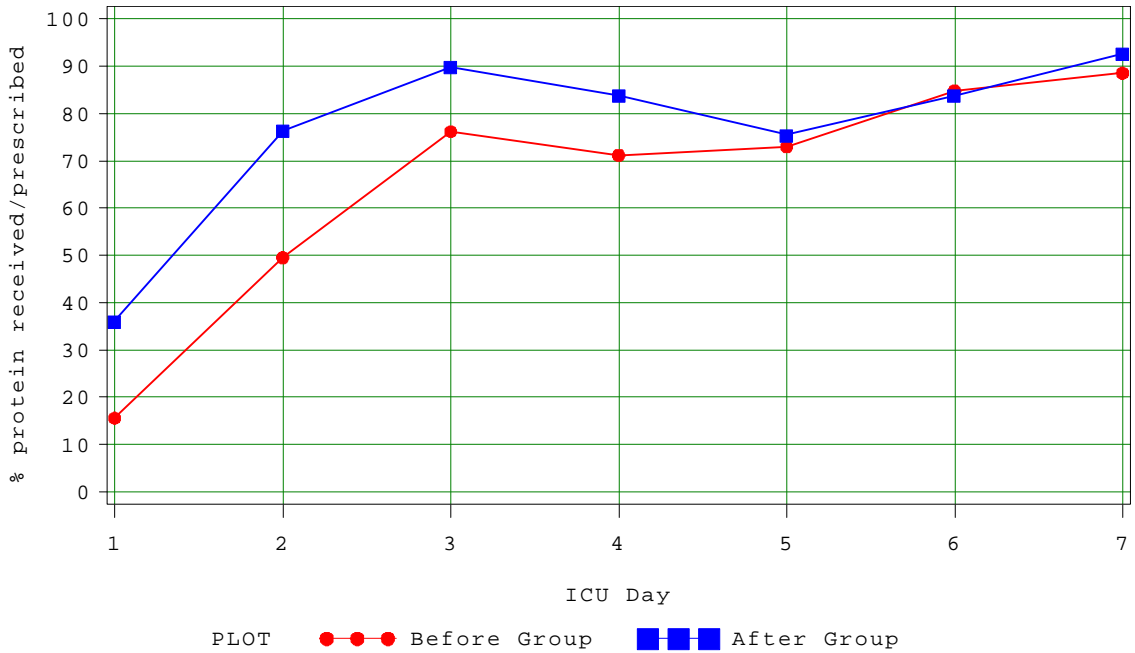

|                | Day 1 | Day 2 | Day 3 | Day 4 | Day 5 | Day 6 | Day 7 | Total |
|----------------|-------|-------|-------|-------|-------|-------|-------|-------|
| <b>P-value</b> | 0.42  | 0.06  | 0.09  | 0.14  | 0.88  | 0.64  | 0.48  | 0.14  |

Supplement: MOESM1 [file 9731924]
